# Supplementary material for: Orbitofrontal cortex mediates pain inhibition by monetary reward
Source: PubMed Central journal article supplement — Soc Cogn Affect Neurosci. 2017 Jan 24;12(4):651–61. doi: 10.1093/scan/nsw173 (PMC5390724; doi:10.1093/scan/nsw173), 2017-01-24
Supplement: nsw173_supp.pdf [file nsw173_supp.pdf]

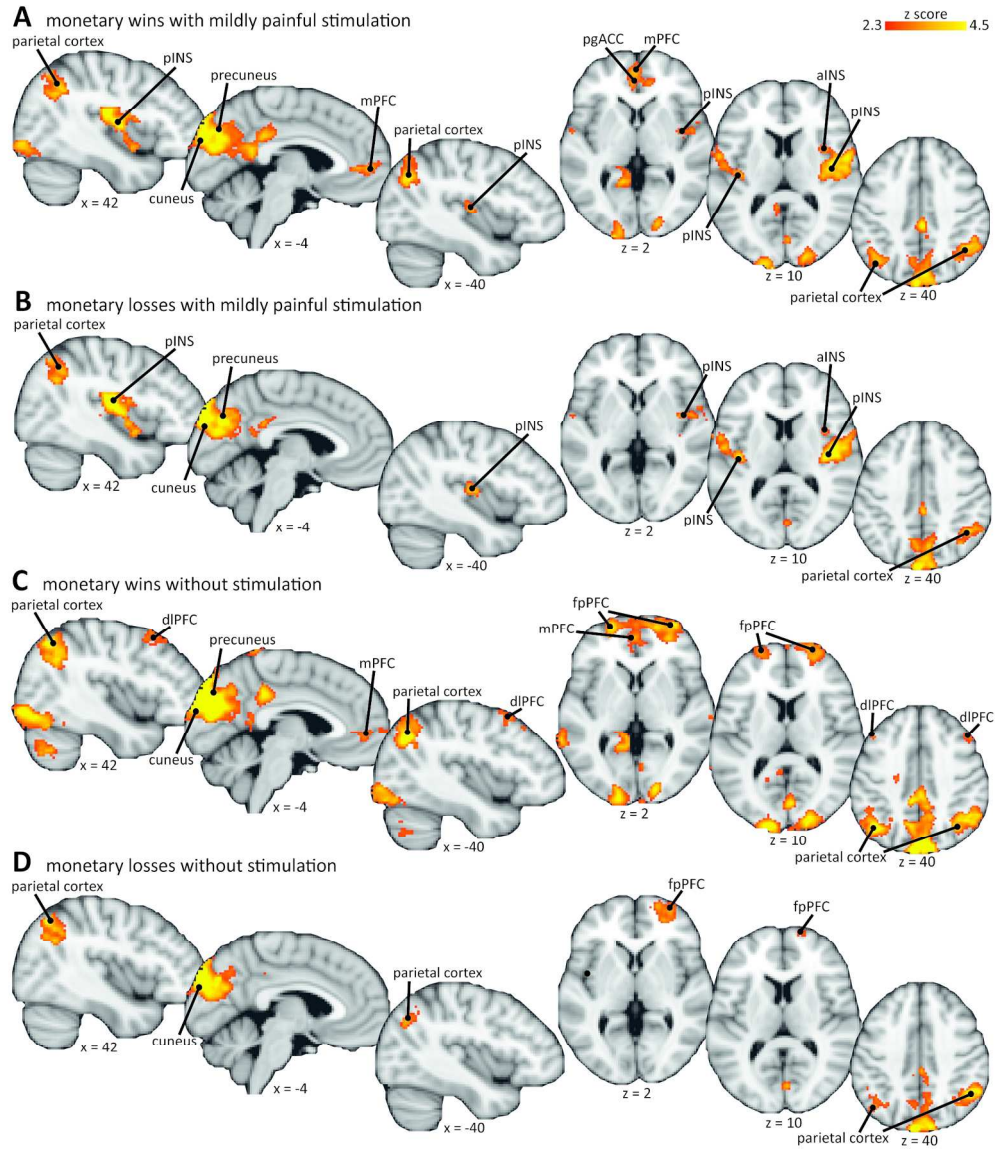

180x205mm (300 x 300 DPI)

## **Supplementary material**

### **Caption Figure S1**

Brain activation associated with (A) monetary wins with simultaneous mildly painful stimulation, (B) monetary losses with simultaneous mildly painful stimulation, (C) monetary wins without simultaneous stimulation, and (D) monetary losses without simultaneous stimulation compared to rest; aINS, anterior insula; pINS, posterior insula; mPFC, medial prefrontal cortex; dlPFC, dorsolateral prefrontal cortex; fpPFC, frontopolar prefrontal cortex; pgACC, perigenual anterior cingulate cortex. Images are displayed in neurological convention, i.e. right side of the brain is on the right. Coordinates are given in MNI space. Statistical inference was based on a voxel-based threshold of  $z = 2.3$ , cluster corrected at  $p < .05$  on a whole brain level. For details see Table S1.

## Supplementary material

**Table S1. Brain activation in response to monetary wins and losses with simultaneous mildly painful stimulation and without stimulation.**

| brain region                                          | cluster size<br>(mm <sup>3</sup> ) | z score<br>peak | MNI peak coordinates<br>in mm |      |     |
|-------------------------------------------------------|------------------------------------|-----------------|-------------------------------|------|-----|
|                                                       |                                    |                 | x                             | y    | z   |
| <b><i>monetary wins with mild pain vs. rest</i></b>   |                                    |                 |                               |      |     |
| <i>cluster spanning:</i>                              | 36744                              | 5.27            | 4                             | -80  | 20  |
| cuneus,                                               |                                    | 5.27            | 4                             | -80  | 20  |
| precuneus                                             |                                    | 5.08            | 8                             | -72  | 28  |
| <i>cluster spanning:</i>                              | 10936                              | 5.29            | 44                            | -18  | 18  |
| central opercular cortex,                             |                                    | 5.29            | 44                            | -18  | 18  |
| SII,                                                  |                                    | 4.53            | 56                            | -2   | 8   |
| insula                                                |                                    | 3.51            | 40                            | 2    | -12 |
| parietal cortex                                       | 7904                               | 4.37            | 46                            | -60  | 48  |
| parietal cortex                                       | 6512                               | 4.48            | -42                           | -66  | 34  |
| <i>cluster spanning:</i>                              | 3704                               | 3.96            | -62                           | 8    | 22  |
| premotor cortex,                                      |                                    | 3.96            | -62                           | 8    | 22  |
| insula,                                               |                                    | 3.65            | -40                           | -16  | 10  |
| temporal cortex,                                      |                                    | 3.59            | -56                           | -2   | -16 |
| SII                                                   |                                    | 3.19            | -54                           | -10  | 12  |
| occipital cortex                                      | 3152                               | 4.40            | 20                            | -94  | 6   |
| occipital cortex                                      | 3128                               | 4.55            | -10                           | -106 | 10  |
| <i>cluster spanning:</i>                              | 3056                               | 3.65            | -2                            | 52   | 2   |
| medial prefrontal cortex,                             |                                    | 3.65            | -2                            | 52   | 2   |
| perigenual ACC                                        |                                    | 3.13            | 12                            | 42   | 0   |
| occipital cortex                                      | 2944                               | 4.56            | 40                            | -84  | -8  |
| <b><i>monetary losses with mild pain vs. rest</i></b> |                                    |                 |                               |      |     |
| <i>cluster spanning:</i>                              | 25384                              | 5.48            | 8                             | -82  | 26  |
| cuneus,                                               |                                    | 5.48            | 8                             | -82  | 26  |
| precuneus                                             |                                    | 4.90            | -4                            | -74  | 32  |
| <i>cluster spanning:</i>                              | 11312                              | 5.56            | 44                            | -16  | 16  |
| central opercular cortex,                             |                                    | 5.56            | 44                            | -16  | 16  |

|                                                            |       |              |          |            |           |
|------------------------------------------------------------|-------|--------------|----------|------------|-----------|
| SII,<br>insula                                             |       | 4.17<br>3.94 | 54<br>38 | -8<br>2    | 10<br>-14 |
| parietal cortex                                            | 6064  | 3.87         | 48       | -58        | 48        |
| insula                                                     | 3744  | 3.99         | -42      | -16        | 10        |
| <b><i>monetary wins without stimulation vs. rest</i></b>   |       |              |          |            |           |
| <i>cluster spanning:</i>                                   | 62736 | 6.72         | -6       | -94        | 26        |
| cuneus,<br>precuneus                                       |       | 6.72<br>6.33 | -6<br>-2 | -94<br>-76 | 26<br>32  |
| occipital cortex                                           | 18488 | 5.25         | 18       | -94        | 6         |
| <i>cluster spanning:</i>                                   | 15752 | 4.34         | 36       | 64         | 2         |
| frontopolar prefrontal cortex,<br>medial prefrontal cortex |       | 4.34<br>3.77 | 36<br>2  | 64<br>50   | 2<br>-4   |
| parietal cortex                                            | 12080 | 4.95         | 44       | -62        | 46        |
| parietal cortex                                            | 12000 | 4.99         | -42      | -68        | 34        |
| temporal cortex                                            | 8216  | 4.54         | -56      | -54        | -14       |
| temporal cortex                                            | 4800  | 3.90         | 60       | -6         | -10       |
| dorsolateral prefrontal cortex                             | 3056  | 3.80         | -26      | 22         | 58        |
| dorsolateral prefrontal cortex                             | 3048  | 3.38         | 30       | 24         | 58        |
| <b><i>monetary losses without stimulation vs. rest</i></b> |       |              |          |            |           |
| cuneus                                                     | 21880 | 5.41         | 8        | -82        | 26        |
| parietal cortex                                            | 9000  | 4.78         | 48       | -62        | 46        |
| parietal cortex                                            | 3664  | 3.86         | -42      | -68        | 36        |
| frontopolar prefrontal cortex                              | 3128  | 3.46         | 26       | 50         | 2         |

Brain areas that were significantly activated when obtaining monetary wins or losses simultaneously with mild painful stimulation and without stimulation (significant on a whole brain-level, voxel-based threshold  $z = 2.3$  and cluster-based threshold  $p < 0.05$ ). Local maxima within the clusters are given for individual anatomical areas. SII, secondary somatosensory cortex; ACC, anterior cingulate cortex.
